# Supplementary material for: Synthesis and characterization of 1,1′-azobis(5-methyltetrazole)
Source: Royal Society of Chemistry journal article supplement (doi:10.1039/c2nj40731k), 2012-01-01
Supplement: c2nj40731k.pdf [file c2nj40731k.pdf]

## **Supporting Information (SI)**

### **Synthesis and Characterization of 1,1'-Azobis(5-methyltetrazole)**

Yongxing Tang; Hongwei Yang\*; Jianhua Shen; Bo Wu;  
Xuehai Ju; Chunxu Lu; Guangbin Cheng\*

School of Chemical Engineering, Nanjing University of Science and Technology

Nanjing 210094, P. R. China

**Email: [hyang@mail.njust.edu.cn](mailto:hyang@mail.njust.edu.cn) (H. Yang)**

**[gcheng@mail.njust.edu.cn](mailto:gcheng@mail.njust.edu.cn) (G. Cheng)**

## Experimental Section

**Caution:** 1,1'-azobis(5-methyltetrazole) reported in this publication is very sensitive towards friction, impact, and electrostatic discharge. Therefore proper safety precautions should be taken when handling these compounds. Laboratories and personnel should be properly grounded, and safety equipment such as Kevlar gloves, leather coats, face shields, and ear plugs are recommended.

**General methods:** All chemical reagents and solvents (analytical grade) were used as supplied unless otherwise stated.  $^1\text{H}$  and  $^{13}\text{C}$  spectra were measured with a Bruker Avance III 500 MHz Digital NMR Spectrometer operating at 500, 126 MHz. All chemical shifts are quoted in ppm relative to TMS ( $^1\text{H}$ ,  $^{13}\text{C}$ ). FT-IR spectra was recorded on a BOMEM MB Series 154S FTIR spectrometer. Raman spectra was measured with a RamTracer®-200 instrument. Mass spectra was recorded on Finnigan TSQ Quantum ultra instrument using electro spray ionization (ESI) method. Elemental analysis was performed by on a Vario EL III recorder. TG and DSC studies were carried out on a STD-Q600 at a heating rate of  $5\text{ }^\circ\text{C}\cdot\text{min}^{-1}$  in closed Al containers with a nitrogen flow of  $80\text{ mL}\cdot\text{min}^{-1}$  (0.162 mg of powder). The electrostatic sensitivity test was carried out using an Electric Spark Tester ESD JGY-50 III.

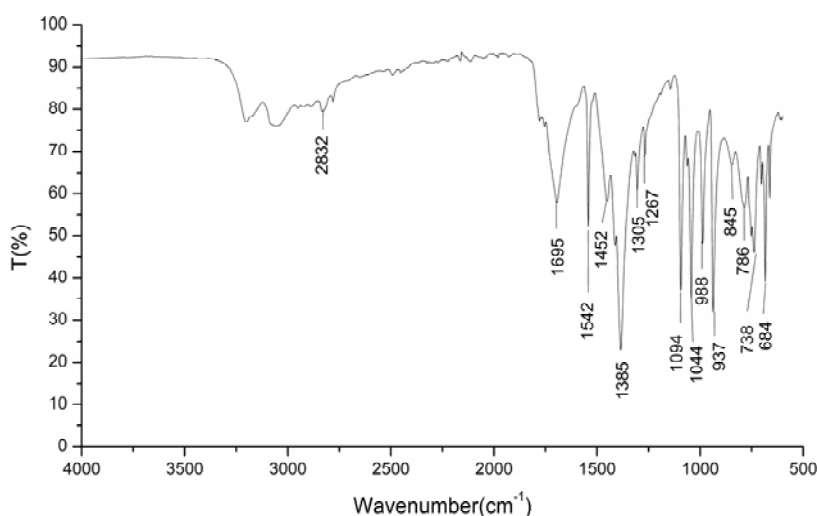

Figure S1. Infrared spectrum of 5

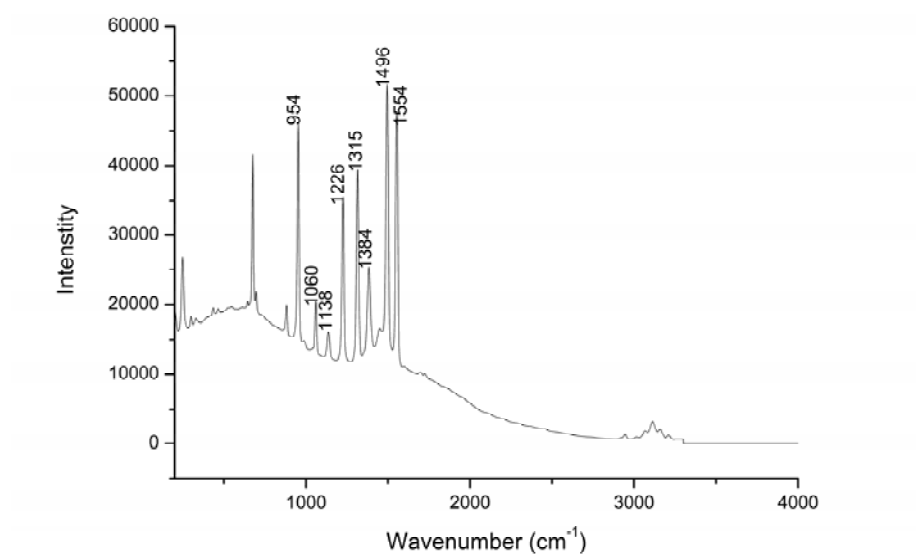

**Figure S2.** Raman spectrum of **5**

**Table S1.** Selected Raman and IR frequencies for **5** presented and their possible assignment.

| IR   | Raman | Possible assignment                                                                 |
|------|-------|-------------------------------------------------------------------------------------|
| 2832 | --    | $\nu_s\text{CH}_3$                                                                  |
| 1542 | 1554  | $\nu(\text{C}_1=\text{N}_1+\text{N}_5=\text{N}_6)$                                  |
| 1452 | 1496  | $\nu_{\text{as}}(\text{N}_1=\text{C}_1-\text{N}_4) + \delta_{\text{as}}\text{CH}_3$ |
| 1385 | 1384  | $\nu(\text{N}_2=\text{N}_3), \delta_s\text{CH}_3$                                   |
| 1305 | 1315  | $\nu(\text{C}_1=\text{N}_1), \nu(\text{N}_2=\text{N}_3)$                            |
| 1267 | 1226  | $\nu_{\text{as}}(\text{N}_5-\text{N}_4-\text{N}_3)$                                 |
| 1094 | 1138  | $\nu_{\text{as}}(\text{N}_1-\text{N}_2+\text{N}_3-\text{N}_4)$                      |
| 1044 | 1060  | $\nu_s(\text{N}_1-\text{N}_2+\text{N}_3-\text{N}_4)$                                |

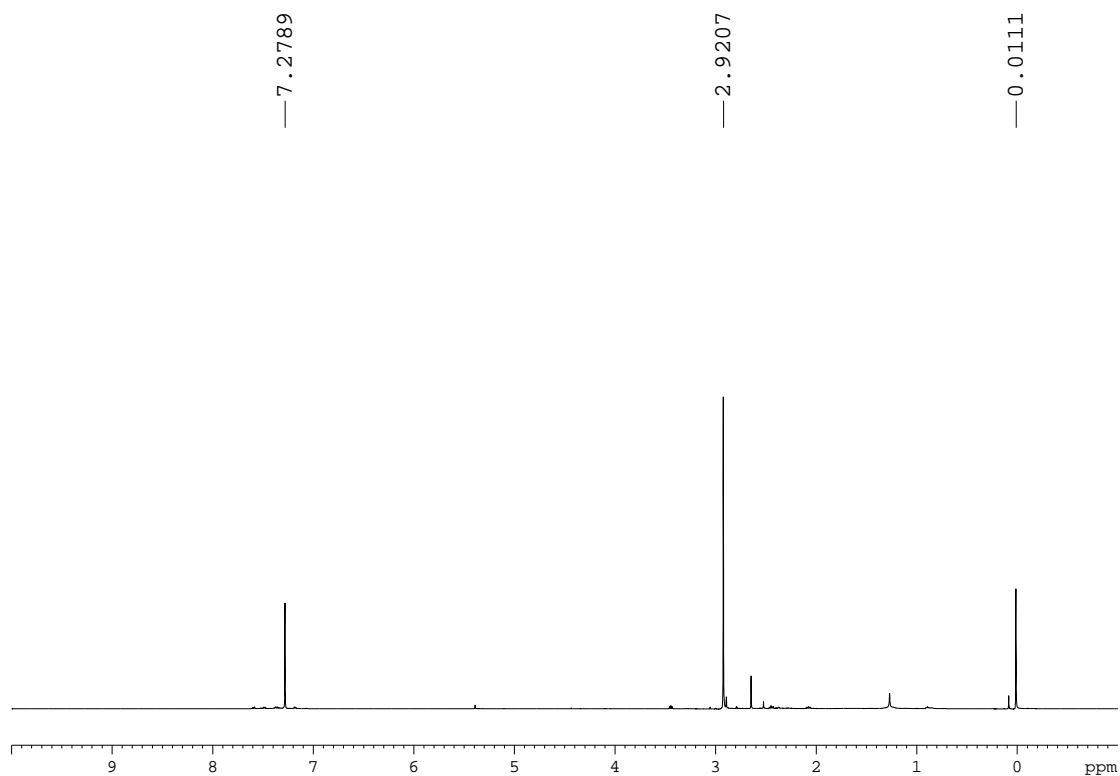

**Figure S3.**  $^1\text{H}$  NMR spectrum (500 MHz) of **5** in  $\text{CDCl}_3$  at 25  $^\circ\text{C}$

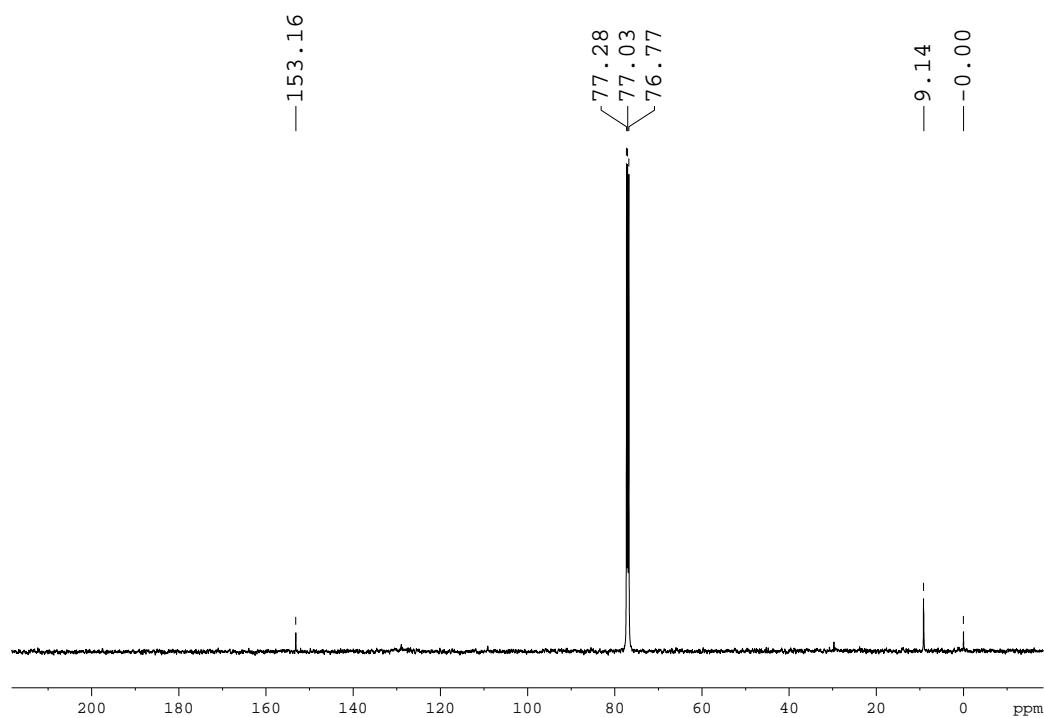

**Figure S4.**  $^{13}\text{C}$  NMR spectrum (126 MHz) of **5** in  $\text{CDCl}_3$  at 25  $^\circ\text{C}$

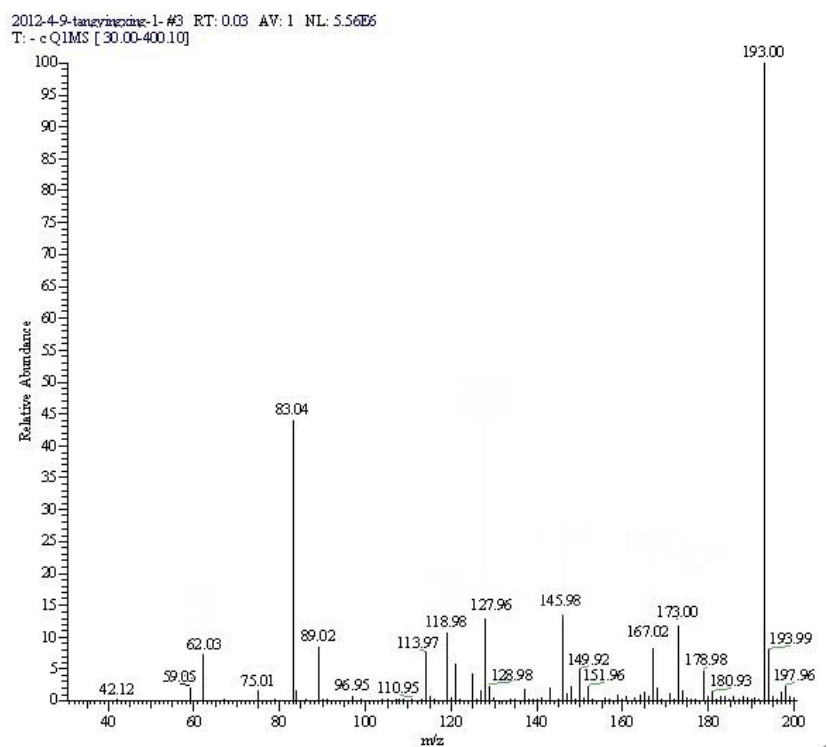

**Figure S5.** Mass spectrum of **5**

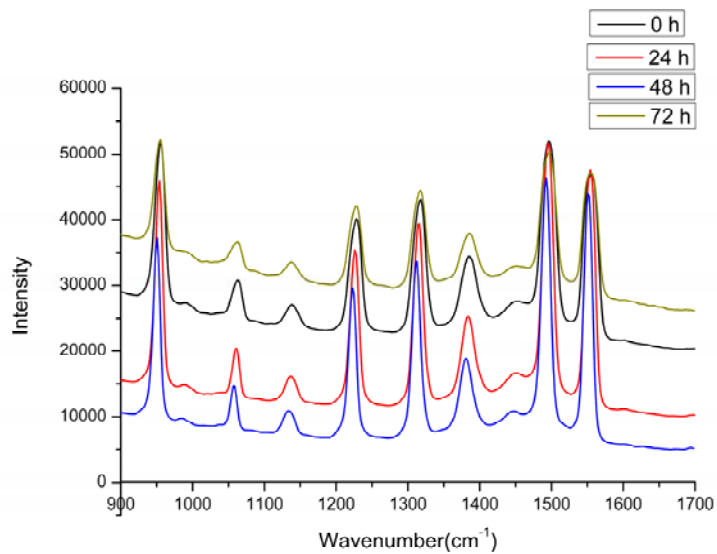

**Figure S6.** No change at Raman spectrum of **5** upon influence of UV light for the three days

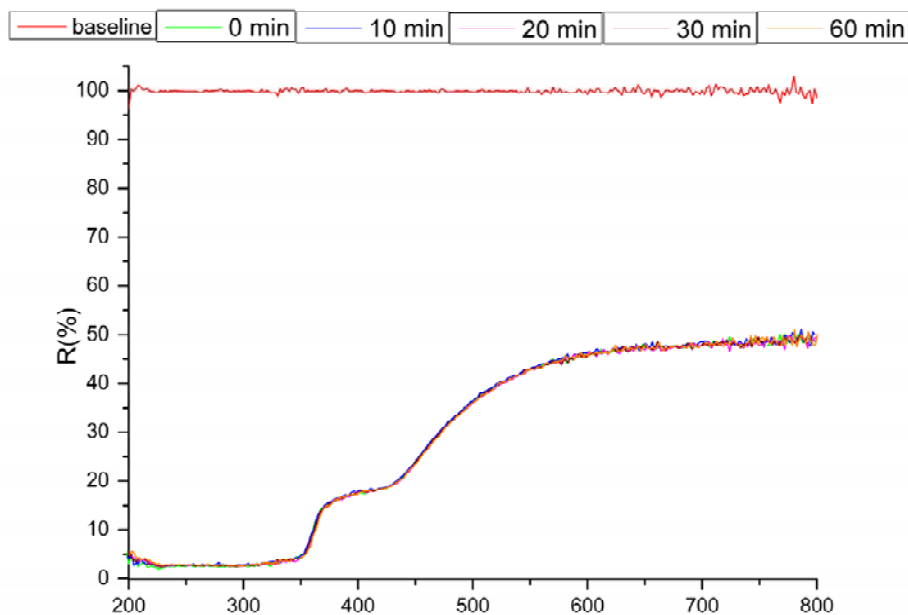

**Figure S7.** No change at UV-vis spectrum of **5** at solid state upon irradiation with xenon light (at room temperature)

### X-ray Structural Analysis of **5**

Single crystals of **5** suitable for X-ray crystallographic analysis were obtained by slow evaporation from the mixture of acetone and ethyl acetate solution at room temperature.

The X-ray diffraction measurements for **5** were carried out on a Rigaku RAXIS-RAPID imaging plate diffractometer at 291 K by using graphite-monochromated Mo K $\alpha$  radiation ( $\lambda = 0.71075 \text{ \AA}$ ). Data were collected by  $\omega$  scan technique. The structure was solved by direct methods with SHELXS-97 and expanded by using the Fourier technique. The non-hydrogen atoms were refined anisotropically. The hydrogen atoms were located and refined. Please see its CIF files. Relevant data are given in Table S2.

**Table S2.** Crystallographic details of **5**

|                                      |                                               |
|--------------------------------------|-----------------------------------------------|
| Compound                             | 1,1'-azobis(5-methyltetrazole)                |
| Formula                              | C <sub>4</sub> H <sub>6</sub> N <sub>10</sub> |
| Formula weight[g·mol <sup>-1</sup> ] | 194.19                                        |
| Temperature                          | 291                                           |

|                                    |                                                  |
|------------------------------------|--------------------------------------------------|
| Crystal system                     | Orthorhombic                                     |
| Space group                        | P2(1)2(1)2(1)                                    |
| Cell parameters                    | a=7.0325(17) Å, b=9.9190(12) Å, c=12.4750(6) Å   |
| Cell volume                        | 870.2(2) Å <sup>3</sup>                          |
| Formula Z                          | 4                                                |
| Calc. density [g/cm <sup>3</sup> ] | 1.48215                                          |
| Absorption correction              | Multi-scan                                       |
| Theta range for data collection[°] | 3.3-26.0                                         |
| Refinement method                  | Full-matrix least-squares on F <sup>2</sup>      |
| Goodness-of-fit on F <sup>2</sup>  | 1.049                                            |
| Final R indices [I>2sigma(I)]      | R <sub>1</sub> =0.0310,wR <sub>2</sub> =0.0745   |
| R indices (all data)               | R <sub>1</sub> = 0.0320,wR <sub>2</sub> = 0.0751 |
| Largest diff. peak and hole        | 0.11 and -0.11 e.Å <sup>-3</sup>                 |
| CCDC                               | 889575                                           |

**Table S3.** Selected bond distances

| Parameter                      | Bond length(Å) | Parameter                       | Bond length(Å) |
|--------------------------------|----------------|---------------------------------|----------------|
| N <sub>1</sub> -N <sub>2</sub> | 1.375(2)       | N <sub>7</sub> -N <sub>8</sub>  | 1.3594(18)     |
| N <sub>1</sub> -C <sub>1</sub> | 1.309(2)       | N <sub>7</sub> -C <sub>3</sub>  | 1.3501(19)     |
| N <sub>2</sub> -N <sub>3</sub> | 1.285(2)       | N <sub>8</sub> -N <sub>9</sub>  | 1.290(2)       |
| N <sub>3</sub> -N <sub>4</sub> | 1.3602(19)     | N <sub>9</sub> -N <sub>10</sub> | 1.373(2)       |
| N <sub>4</sub> -N <sub>5</sub> | 1.3790(17)     | N <sub>10</sub> -C <sub>3</sub> | 1.309(2)       |
| N <sub>4</sub> -C <sub>1</sub> | 1.3526(19)     | C <sub>1</sub> -C <sub>2</sub>  | 1.475(2)       |
| N <sub>5</sub> -N <sub>6</sub> | 1.2427(18)     | C <sub>3</sub> -C <sub>4</sub>  | 1.478(3)       |
| N <sub>6</sub> -N <sub>7</sub> | 1.3805(18)     |                                 |                |

### Computation details

Computations were carried out by using the Gaussian03 suite of programs. The elementary geometric optimization and the frequency analysis were performed at the level of Becke three Lee-Yan-Parr (B3LYP) Functionals<sup>1</sup> with 6-311+G\*\* basis set<sup>2</sup>. All of the optimized structures were characterized to be local energy minima on the potential surface without any imaginary frequencies.

The gas phase heat of formation (HOF) of **5** (Table S4) was determined by using the method of permutation reactions<sup>3</sup>. For the azo compounds reported here, the permutation reactions were carried out as Hakima Abou-Rachid did<sup>4</sup> (Scheme S1). The accuracy of the method was also proved by the HOF prediction of **5**, as shown in Table S4. According to the optimized structure, the total energy ( $E_0$ ) and thermodynamic parameters, including zero point energy (ZPE) and thermal correction to Enthalpy (HT), were obtained at the B3LYP/6-311+G\*\* level<sup>5</sup>.

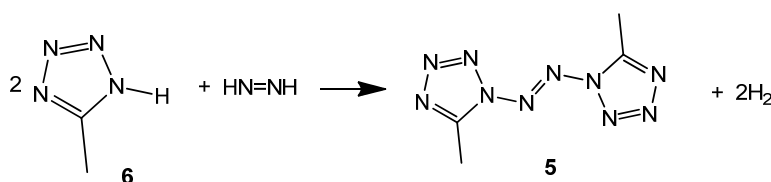

**Scheme S1.** Permutation reactions for compound **5**

**Table S4.** The theoretic calculation of heat of formation (HOF) for compound **5**

| Compd.                             | $E_0$ (a.u)  | ZPE <sup>[a]</sup> | $H_T$<br>(kJ/mol) | HOF (kJ/mol)          |
|------------------------------------|--------------|--------------------|-------------------|-----------------------|
| <b>5</b>                           | -703.5359922 | 342.37             | 36.57             | 986.05                |
| H <sub>2</sub>                     | -1.1795710   | 25.38              | 8.68              | 0.00                  |
| 5-methyl-1H-tetrazole ( <b>6</b> ) | -297.6593033 | 187.22             | 16.49             | 280.70 <sup>[b]</sup> |
| N <sub>2</sub> H <sub>2</sub>      | -110.6795238 | 70.35              | 10.03             | 194.97 <sup>[c]</sup> |

[a] Scale factor for ZPE and vibrational frequencies is 0.96.

[b] Kozyro, A. A.; Simirskii, V. V.; Krasulin, A. P. et al. *Russ. J. Phys. Chem. (Engl. Transl.)* **1990**, 64, 348-350.

[c] B. Ruscic; J. Berkowitz. *J. Chem. Phys* **1991**, 95, 4378-4384.

### Detonation Parameters

Detonation velocity ( $D$ ) and detonation pressure ( $P$ ) were evaluated by the empirical Kamlet formula as

$$P = 1.558 \rho^2 \Phi \quad (1)$$

$$D = 1.01 \Phi^{1/2} (1 + 1.30 p_0) \quad (2)$$

$$\Phi = 0.4889 N (MQ)^{1/2} \quad (3)$$

where  $D$  is the predicted detonation velocity (km/s) and  $P$  is the detonation pressure (GPa),  $\rho$  is the density of a compound (cm<sup>3</sup>/mol).  $\Phi$ ,  $N$ ,  $M$  and  $Q$  are characteristic parameters of an explosive,  $Q$  is chemical energy of detonation (kJ/g). The crystal



densities and the calculated heats of formation were used in computing the D and P values.

## Reference

- 1 (a) Becke, A. D., *J. Phys. Chem.* **1993**, *98* (7), 5648-5652; (b) Stephens, P. J.; Devlin, F. J.; Chabalowski, C. F.; Frisch, M. J., *J. Phys. Chem.* **1994**, *98* (45), 11623-11627.
- 2 Hariharan, P. C.; Pople, J. A., *Theoretica Chimica Acta* **1973**, *28* (3), 213-222.
- 3 (a) Schmidt, M. W.; Gordon, M. S.; Boatz, J. A., *J. Phys. Chem. A* **2005**, *109* (32), 7285-7295; (b) Gao, H.; Ye, C.; Piekarski, C. M.; Shreeve, J. M., *J. Phys. Chem. C* **2007**, *111* (28), 10718-10731.
- 4 Jaidann, M.; Roy, S.; Abou-Rachid, H.; Lussier, L. S., *J. Hazard Mater.* **2010**, *176* (1-3), 165-173.
- 5 Pople, J. A.; Binkley, J. S.; Seeger, R., *Int. J. Quantum Chem.* **1976**, *10* (S10), 1-19.
